# Supplementary material for: Accessory Gland as a Site for Prothoracicotropic Hormone Controlled Ecdysone Synthesis in Adult Male Insects
Source: PubMed Central journal article supplement (PMC3562185; doi:10.1371/journal.pone.0055131), 2013-02-01
Supplement: pone.0055131.s002.pdf [file pone.0055131.s002.pdf]

Table S1  
Oligonucleotide primers

| <b>Primers</b>               | <b>5'-3' sequences</b>  |
|------------------------------|-------------------------|
| <b>Primers used for qPCR</b> |                         |
| <b>In <i>Tribolium</i>:</b>  |                         |
| <i>Tcspo</i> /forward        | GGGACGAGCCTGGACTGTT     |
| <i>Tcspo</i> /reverse        | CCCGTGCTGAAAGGAATGA     |
| <i>Tcspot</i> /forward       | CCTGAGCATTTCCTACCGTTC   |
| <i>Tcspot</i> /reverse       | CCCACCCAGAATCCCAAAG     |
| <i>Tcphm</i> /forward        | AAGAATGTGTGTCGGTGATGAA  |
| <i>Tcphm</i> /reverse        | TCGTGAGGTTTCGGAGTTAGTG  |
| <i>Tcdib</i> /forward        | ACAGGAAGAGCCACCTCACC    |
| <i>Tcdib</i> /reverse        | ACCATTCGGGTCCATTTGTT    |
| <i>Tcsad</i> /forward        | GCTAAGAGCCCGCAAATCC     |
| <i>Tcsad</i> /reverse        | GGTAAAGCCGCAAAGTCTCCT   |
| <i>Tcshd</i> /forward        | GGTCAACGAACAAGGTGAGG    |
| <i>Tcshd</i> /reverse        | GAGTCGGTCTGCGATGTAGTTT  |
| <i>TcrpS3</i> /forward       | CAACTCGCACGGAAATCATC    |
| <i>TcrpS3</i> /reverse       | CCACCTTCTCGCCATACAAA    |
| <b>In <i>Drosophila</i>:</b> |                         |
| <i>E74A</i> /forward         | TTTCTCTGCCGTTGTCGTC     |
| <i>E74A</i> /reverse         | GCACTGAGACCCGCTCAC      |
| <i>E74B</i> /forward         | CGCGAGTTCAAAGTGCTCTA    |
| <i>E74B</i> /reverse         | GGAGGGAGAGTGGTGGTGT     |
| <i>E75B</i> /forward         | CAACAGCAACAACACCCAGA    |
| <i>E75B</i> /reverse         | CAGATCGGCACATGGCTTT     |
| <i>phm</i> /forward          | GGATTTCTTTCGGCGCGATGTG  |
| <i>phm</i> /reverse          | TGCCTCAGTATCGAAAAGCCGT  |
| <i>dib</i> /forward          | TGCCCTCAATCCCTATCTGGTC  |
| <i>dib</i> /reverse          | ACAGGGTCTTCACACCCATCTC  |
| <i>sad</i> /forward          | CCGCATTCAGCAGTCAGTGG    |
| <i>sad</i> /reverse          | ACCTGCCGTGTACAAGGAGAG   |
| <i>rpL23</i> /forward        | GACAACACCGGAGCCAAGAACC  |
| <i>rpL23</i> /reverse        | GTTTGCGCTGCCGAATAACCAC. |

**Primers used for dsRNA synthesis**

TcspoRNAi/forward taatacgactcactatagggagaGCTCGCCCAGATTCACTTC  
TcspoRNAi/reverse taatacgactcactatagggagaATGGTGGCTTCCGTGTAGG

TcspotRNAi/forward taatacgactcactatagggagaTTGTTGCCCTTCCACGAGA  
TcspotRNAi/reverse taatacgactcactatagggagaCCCACCCAGAATCCCAAAG

TcphmRNAi/forward taatacgactcactatagggagaTCACGAGACGATGCCACTT  
TcphmRNAi/reverse taatacgactcactatagggagaCCAATTCATCACCGACACAC

TcGFPRNAi/forward taatacgactcactatagggagaTTTTCACTGGAGTTGTCCCAAT  
TcGFPRNAi/reverse taatacgactcactatagggagaTTTGTGTCCAAGAATGTTTCCA

**Primers used for synthesis of the *in situ* probe**

Tcspot/forward(2) ACAGAAGAACATAAGGGAGGCG  
Tcspot/reverse(2) taatacgactcactatagggTCGAAGTCGTGTTGGTTCG

T7 RNA polymerase promoter sites are shown in lower case letters. Tc: *Tribolium castaneum*
