# Supplementary material for: Accessory Gland as a Site for Prothoracicotropic Hormone Controlled Ecdysone Synthesis in Adult Male Insects
Source: PLOS journal article supplement (doi:10.1371/journal.pone.0055131), 2013-02-01

Figure S1

A

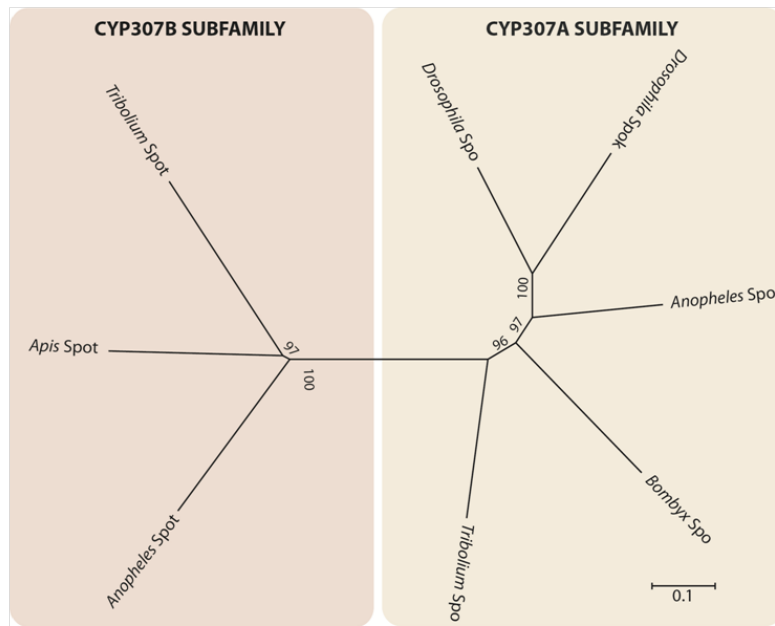

B

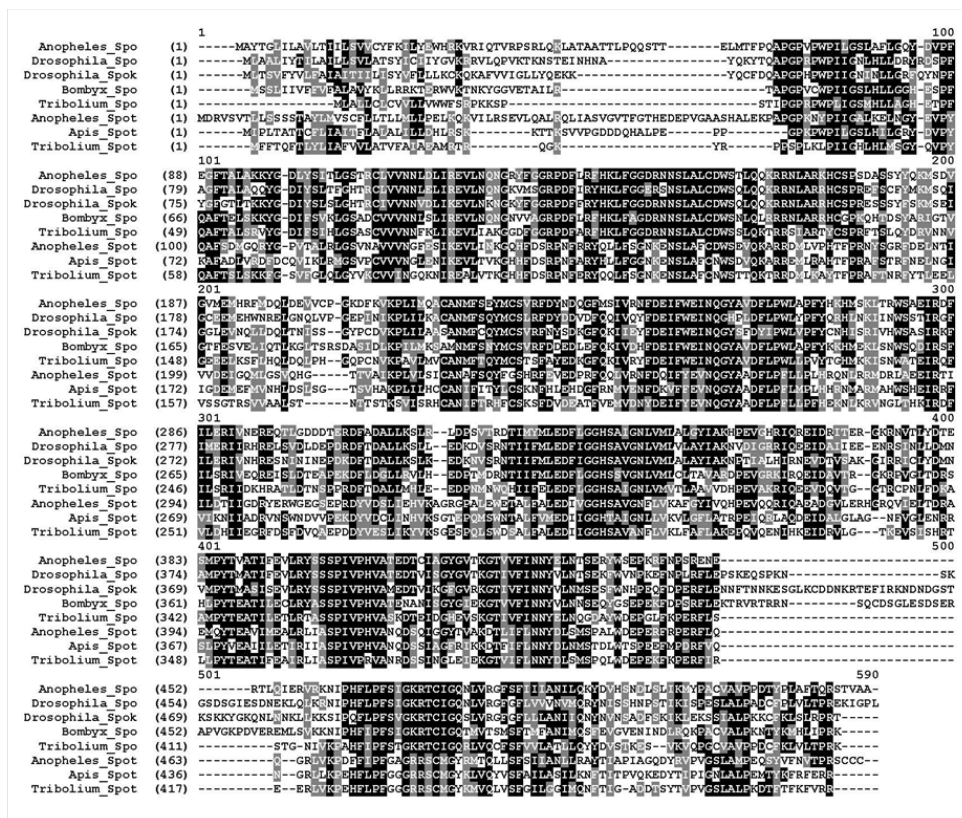

Supplement: S1 (10.1371/journal.pone.0055131.s001) [file journal.pone.0055131.s001]
